# Supplementary material for: Customizable 3D Printed Implants Containing Triamcinolone Acetonide: Development, Analysis, Modification, and Modeling of Drug Release
Source: MDPI journal article supplement (doi:10.3390/pharmaceutics15082097), 2023-08-08
Supplement: s1 [file s1]

# Supplementary Materials: Customizable 3D-printed Implants Containing Triamcinolone Acetonide: Development, Analysis, Modification, and Modeling of Drug Release

Hanna Ponsar, Julian Quodbach

Supplementary information:

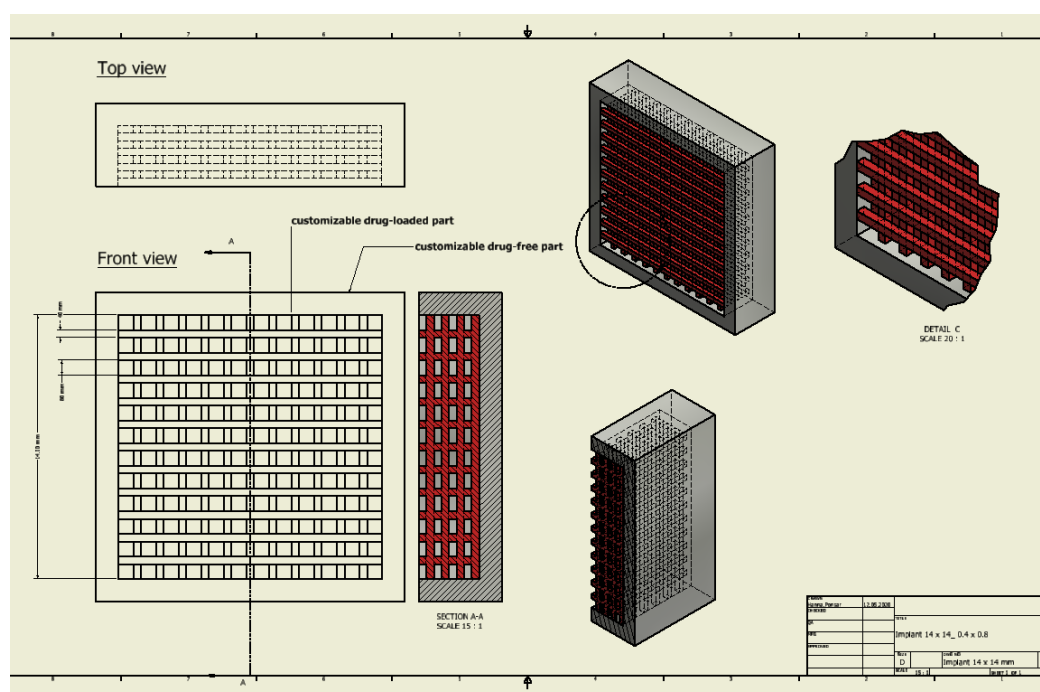

**Figure S1.** Technical drawing of the modular implant concept, consisting of the drug-free shell (grey) and the drug-loaded network (red).

**Table S1.** HME barrel temperatures and haul-off speed applied during filament production.

| Formulation | Barrel temperature from zone T1 (gear) to T10 (die) [°C] |    |    |     |     |     |     |     |     |     | Haul-off speed [m/min] |
|-------------|----------------------------------------------------------|----|----|-----|-----|-----|-----|-----|-----|-----|------------------------|
|             | T1                                                       | T2 | T3 | T4  | T5  | T6  | T7  | T8  | T9  | T10 |                        |
| F1, F2      | -                                                        | 30 | 80 | 120 | 170 | 180 | 180 | 190 | 190 | 190 | 2.1                    |

**Table S2.** Detailed 3D-printing settings for two component implants.

| Settings                               | Two-component implants |                            |           |           |
|----------------------------------------|------------------------|----------------------------|-----------|-----------|
|                                        | Drug-free shell        | Drug-loaded network inlays |           |           |
|                                        |                        | 0.4 mm                     | 0.8 mm    | 1.2 mm    |
| Filament                               | F6                     | F12                        | F12       | F12       |
| Print temperature [°C]                 | 185                    | 185                        | 185       | 185       |
| Build plate temp. [°C]                 | 90                     | 90                         | 90        | 90        |
| Nozzle diameter [mm]                   | 0.4                    | 0.4                        | 0.4       | 0.4       |
| Layers and perimeters                  |                        |                            |           |           |
| Layer height (first layer height) [mm] | 0.2 (0.2)              | 0.2 (0.2)                  | 0.2 (0.2) | 0.2 (0.2) |

| Settings                      | Two-component implants |                            |         |         |
|-------------------------------|------------------------|----------------------------|---------|---------|
|                               | Drug-free shell        | Drug-loaded network inlays |         |         |
|                               |                        | 0.4 mm                     | 0.8 mm  | 1.2 mm  |
| Perimeters                    | 1                      | 0                          | 1       | 1       |
| Solid layers (top and bottom) | 0                      | 0                          | 0       | 0       |
| Seam position                 | nearest                | nearest                    | nearest | nearest |
| Infill                        |                        |                            |         |         |
| Infill density [%]            | 100                    | 100                        | 100     | 100     |
| Fill pattern                  | rectilinear            |                            |         |         |
| Fill angle [°]                | 45                     | 90                         | 90      | 90      |
| Speed [mm/s]                  |                        |                            |         |         |
| Perimeters                    | 25                     | 10                         | 20      | 15      |
| Infill                        | 20                     | 8                          | 16      | 12      |
| Travel                        | 80                     | 120                        | 80      | 120     |
| First layer                   | 12.5                   | 10                         | 10      | 15      |
| Others                        |                        |                            |         |         |
| Extrusion width [mm]          | 0.39                   | 0.39                       | 0.4     | 0.4     |
| Infill/perimeter overlap [%]  | 5                      | N/A                        | 5       | 5       |
| Ooze shield                   | yes                    | yes                        | yes     | yes     |

**Table S3.** Exemplary true strand widths [ $\mu\text{m}$ ] of implants networks (determined via X-ray computed tomography (n = 3)).

| Implant<br>(strand width x pore size) | Strand width (mean $\pm$ s)<br>[ $\mu\text{m}$ ] | Deviation from set point |
|---------------------------------------|--------------------------------------------------|--------------------------|
| 0.4 x 0.4                             | 429 $\pm$ 21                                     | 0.07                     |
| 0.8 x 0.8                             | 914 $\pm$ 37                                     | 0.13                     |
| 1.2 x 1.2                             | 1241 $\pm$ 61                                    | 0.03                     |
